# Supplementary material for: Superamphiphobic coatings with coralline-like structure enabled by one-step spray of polyurethane/carbon nanotube composites
Source: Royal Society of Chemistry journal article supplement (doi:10.1039/c2jm30744h), 2012-01-01
Supplement: c2jm30744h.pdf [file c2jm30744h.pdf]

## Supporting Information

# Superamphiphobic coatings with coralline-like structure enabled by one-step spray of polyurethane/carbon nanotube composites

*Xiaolong Wang, Haiyuan Hu, Qian Ye, Tingting Gao, Feng Zhou\* and Qunji Xue*

State Key Laboratory of Solid Lubrication, Lanzhou Institute of Chemical Physics, Chinese Academy of Sciences, Lanzhou 730000, P. R. China

E-mail: zhouf@lzb.ac.cn

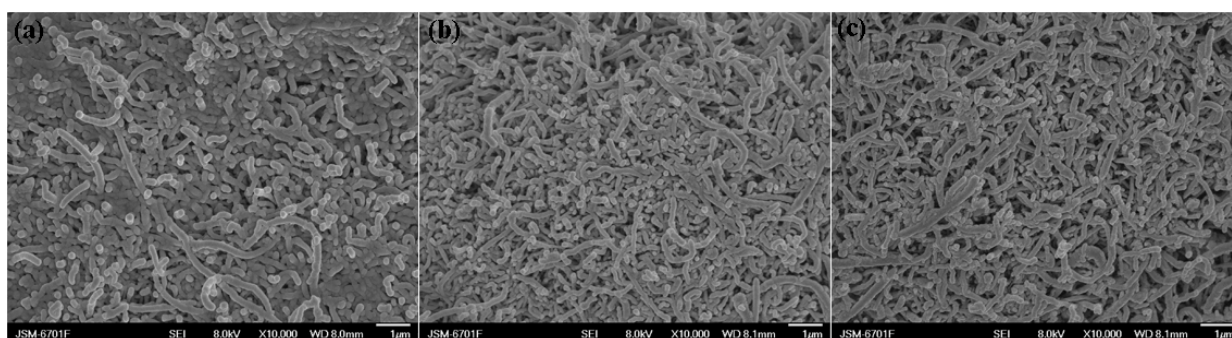

**Fig. S1** SEM images of raw MWCNTs (a), MWCNTs-COOH (b) and MWCNTs-PFOL (c).

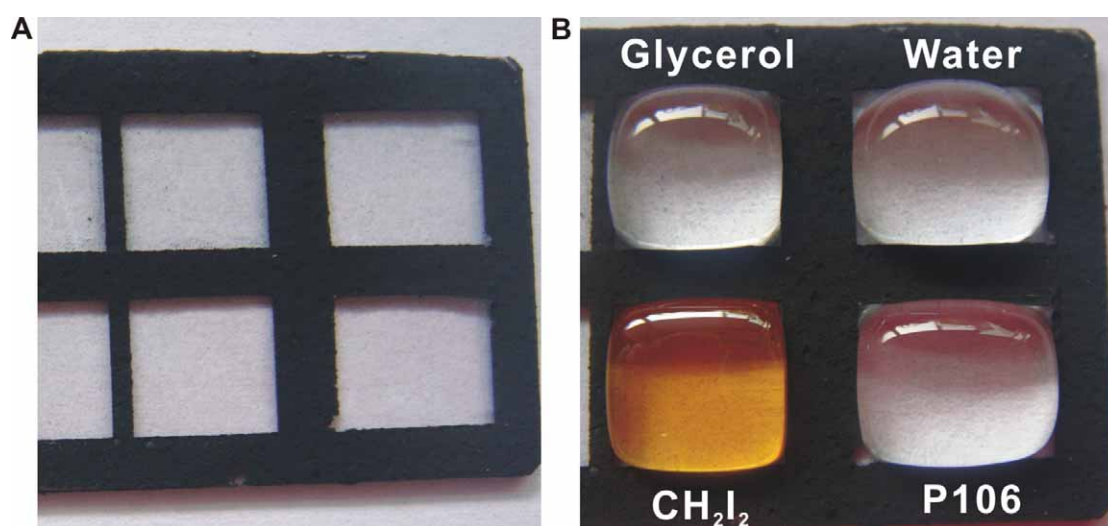

**Fig. S2** Photographs of (A) patterned coating on glass slide and (B) liquids sealing demonstration by using the patterned coating.

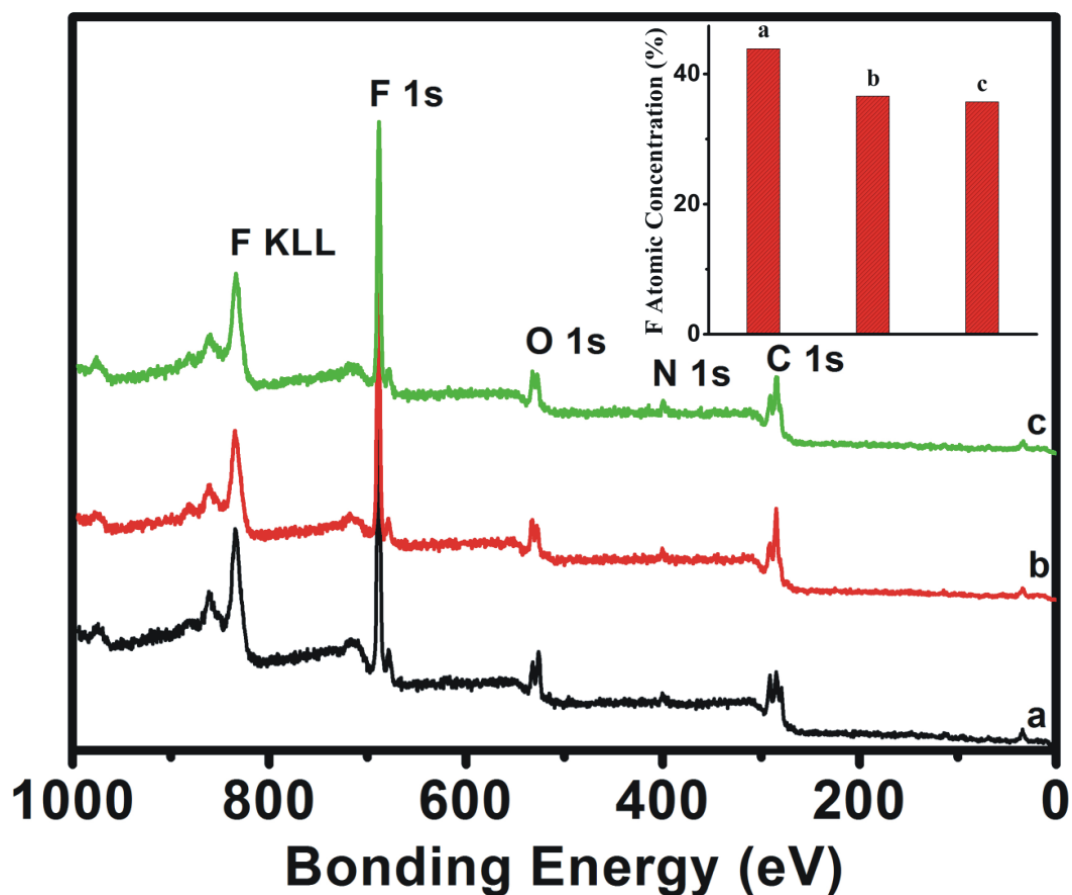

**Fig. S3** XPS survey spectra of coatings fabricated by CNTs and PU with/without perfluoroalkyl modification. a) Both CNTs and PU with perfluoroalkyl modification; b) only PU with perfluoroalkyl modification; c) only CNT with perfluoroalkyl modification. The inset is the surface F atomic concentration of the three coatings measured by XPS.

**Movie S1** Demonstration of movement of water droplets on thin coating fabricated on A4 paper.

**Movie S2** Demonstration of movement of  $\text{CH}_2\text{I}_2$  droplet on coating fabricated on cotton fabric.
